## **A New Model to Determine the Personal Reference Interval of Tests in Laboratory Medicine: A Preliminary Study**

Abdurrahman Coskun<sup>1,2</sup>, Mustafa serteser<sup>1,2</sup>, Coskun Cavusoglu<sup>1</sup>, Meltem Kilercik<sup>1,2</sup>, Ibrahim Unsal<sup>1</sup>

<sup>1</sup>Acibadem Labmed Clinical Laboratories, <sup>2</sup>Acibadem Mehmet Ali Aydinlar University School of Medicine, Department of Medical Biochemistry

**Corresponding Author:** Abdurrahman Coskun, MD, Acibadem Mehmet Ali Aydinlar University School of Medicine, Department of Medical Biochemistry, Istanbul, Turkey  
Telephone: +90 532 744 66 83  
Fax: +90 216 576 51 20  
[Coskun2002@gmail.com](mailto:Coskun2002@gmail.com)

"The authors have withdrawn this manuscript because they discovered errors in the equations that no longer support the findings given in the paper. Therefore, the authors do not wish this work to be cited as reference for the project. If you have any questions, please contact the corresponding author."
